# Supplementary material for: Assessment of depression and anxiety in young and old with a question-based computational language approach
Source: PubMed Central journal article supplement (PMC10955843; doi:10.1038/s44184-023-00032-z), 2023-07-24
Supplement: 44184_2023_32_MOESM1_ESM.pdf [file 44184_2023_32_MOESM1_ESM.pdf]

## Supplementary Information: Validation of the SDAS for MDD and GAD

The *SDAS symptoms focus* is based on Yes and No questions about symptoms described in the DSM-5 for MDD and GAD (see questions and question codes below). The answers were computed as described in the DSM-5:

*MDD: Respondents answering Yes to either SDAS\_MDD\_1 or SDAS\_MDD\_2 – and together answering Yes to at least 5 of SDAS\_MDD\_1 – SDAS\_MDD\_9 are categorized as depressed.*

*GAD: Respondents answering Yes to SDAS\_GAD\_1 – SDAS\_GAD\_4, and three or more of SDAS\_GAD\_5 – SDAS\_GAD\_10.*

Our study comprised 88 participants (Female = 50; Male = 35, Gender variant/Non-conforming = 1, Transgender Male = 1, Other = 1), with a mean age of 36.6 (SD = 12.6, range = 18 – 65), who completed the study. In random order they answered the SDAS and participated in a video call MINI interview for MDD and GAD, conducted by an experienced clinical psychologist. Table Supplementary Table 1 presents the agreement between the SDAS and the MINI interview.

| Supplementary Table 1. Agreement between SDAS and MINI |                       |       |
|--------------------------------------------------------|-----------------------|-------|
|                                                        | SDAS – MINI interview |       |
| Measure                                                | MDD                   | GAD   |
| kappa                                                  | .7500                 | .5987 |
| sensitivity                                            | .9024                 | .7500 |
| specificity                                            | .8511                 | .8462 |
| balanced accuracy                                      | .8768                 | .7981 |
